# Supplementary material
Source: publisher figshare collection journal article supplement (https://gsajournals.figshare.com/articles/dataset/_/22713796)
Supplement: Supplementary file 1 [file 1]

## Sheet: Sheet1
		MrB3	MrC26	MrCO84	MrCO8	MrE7	PacBio Mean	Illumina Median	Illumina Mean	MrA4295	MrB3	MrC26	MrCo12	MrCo25	MrCo29	MrCo43	MrCo44	MrCo45	MrCo52	MrCo58	MrCo65	MrCo67	MrCo74	MrCo82	MrCo84	MrCo8	MrE7	MrE017P28	MrE020P	MrE030P	MrP5
Sequencing technology		PacBio	PacBio/nanopore	PacBio	PacBio	PacBio		Illumina	Illumina	Illumina	Illumina	Illumina	Illumina	Illumina	Illumina	Illumina	Illumina	Illumina	Illumina	Illumina	Illumina	Illumina	Illumina	Illumina	Illumina	Illumina	Illumina	Illumina	Illumina	Illumina	Illumina
Sequencing Protocol		CLR	CLR	CLR	CLR	CLR	CLR	2x150bp PE	2x150bp PE	2x150bp PE	2x150bp PE	2x150bp PE	2x150bp PE	2x150bp PE	2x150bp PE	2x150bp PE	2x150bp PE	2x150bp PE	2x150bp PE	2x150bp PE	2x150bp PE	2x150bp PE	2x150bp PE	2x150bp PE	2x150bp PE	2x150bp PE	2x150bp PE	2x150bp PE	2x150bp PE	2x150bp PE	2x150bp PE
Number of reads		8398108	605376	9606545	1305975	4556903	4.89458e+06	9.90368e+07	1.03122e+08	147550331	109127749	94817254	156184148	91431275	106599333	91682600	92930817	107441888	98090558	100477914	116770852	95086883	101183288	100604550	91013257	97456742	108853770	80387847	98386257	82922641	99687392
Cumulative length (Gbp)		128.662	9.36255	140.475	14.5428	79.0071	74.4099	29.711	30.9366	44.2651	32.7383	28.4452	46.8552	27.4294	31.9798	27.5048	27.8792	32.2326	29.4272	30.1434	35.0313	28.5261	30.355	30.1814	27.304	29.237	32.6561	24.1164	29.5159	24.8768	29.9062
X-Fold coverage (on 60Mbp)		2144.36	156.043	2341.26	242.38	1316.79	1240.17	495.184	515.611	737.752	545.639	474.086	780.921	457.156	532.997	458.413	464.654	537.209	490.453	502.39	583.854	475.434	505.916	503.023	455.066	487.284	544.269	401.939	491.931	414.613	498.437
# Assembly results
Cumulative length		57477430	59573429	56809613	58180466	57388386	5.78859e+07	57580128	5.80291e+07	57530582	63261847	57359318	57487498	57818534	57467268	58254715	57820032	57208789	56537233	57496270	57606096	57554915	57605341	56938589	57504657	59840651	60753356	57643070	57774892	57459619	57717824
Number of sequences		12	11	14	12	24	14.6	4020	4222.77	4052	4590	3992	4048	3909	3634	4330	3414	3318	3098	3606	3669	3255	3482	3252	4112	7087	4298	6039	6254	5366	4096
GC percentage		46.38	46.37	46.41	46.39	46.37	46.384	46.35	46.3468	46.35	46.64	46.37	46.33	46.33	46.35	46.33	46.36	46.37	46.41	46.36	46.33	46.39	46.35	46.38	46.39	46.28	46.01	46.33	46.32	46.35	46.3
Average sequence length		4.78979e+06	5.41577e+06	4.05783e+06	4.84837e+06	2.39118e+06	4.30059e+06	14285	14389.2	14198.1	13782.5	14368.6	14201.5	14791.1	15813.8	13453.7	16936.2	17242	18249.6	15944.6	15700.8	17682	16543.8	17508.8	13984.6	8443.72	14135.3	9545.13	9238.07	10708.1	14091.3
Median sequence length		4981426	4846211	4536824	5038026	1825874	4.24567e+06	417	407.182	456	347	463	344	416	462	440	421	418	459	430	416	501	405	419	374	445	347	339	329	367	360
Minimum sequence length		3294011	3565931	28080	3601939	33654	2104723	146	144.909	146	146	146	146	146	146	146	146	146	146	146	146	146	146	146	146	146	146	138	138	138	146
Maximum sequence length		6422639	10453569	6313212	6462535	6342623	7.19892e+06	1122618	1.11468e+06	1198519	1007122	1204590	1166949	1205521	863047	830710	1095760	1240036	1239944	962822	1140714	866575	1239910	1012082	1334020	830708	1993086	1122619	838657	1122617	1006927
# Sequence N-values length
N50 Length		5177715	5176161	4880350	5152831	4838025	5.04502e+06	150688	147646	146623	135045	142766	164093	148893	149637	147634	163613	155947	159891	162830	166460	155456	166582	153618	172312	151738	147869	109571	106158	109571	131903
N90 Length		3455326	3581965	3487310	3614675	3512731	3.5304e+06	25012.5	23398	21244	24720	22367	25466	24092	23222	22148	27639	27405	29294	25734	25305	25535	26655	27056	27056	17786	25721	14415	14304	14946	22646
# Sequence N-values index									0
N50 Index		6	5	6	6	6	5.8	100	104.318	100	128	100	98	97	103	106	96	95	91	95	89	102	88	95	89	105	104	135	135	129	115
N90 Index		11	10	11	11	11	10.8	461	476.818	481	539	466	426	459	463	494	413	404	400	424	426	435	394	410	393	504	481	666	671	638	503
# Sequence NG-values length (based on and expected genome size of 60000000bp)
NG25 Length		5611450	6904614	5582776	5648903	5634807	5876510	286873	278289	315776	262699	288637	288589	286055	276789	267093	281672	304123	292326	292489	308879	272389	307876	286737	301823	287009	308731	207134	215505	215690	254329
NG50 Length		5177715	5176161	4880350	5152831	4838025	5.04502e+06	145592	141036	133725	148787	132544	157779	142437	137566	138954	155578	147056	145585	154827	155371	144990	161036	145600	161036	151265	149739	105004	101613	105013	127293
NG75 Length		4378991	4373316	4272715	4324222	3895207	4.24889e+06	58927.5	57320	52602	72510	55724	61039	55718	57250	55470	62426	64341	58544	60791	58307	59311	63869	61190	66131	62306	64717	38807	38018	39059	52911
NG90 Length		3455326	3581965	3306903	3614675	3270775	3.44593e+06	13957.5	14885.4	11325	36957	11797	13671	14035	12863	13958	17372	14359	12111	13663	13957	15510	16058	13143	15816	16935	28604	6839	7224	7301	13981
# Sequence NG-values index (based on and expected genome size of 60000000bp)									0
NG25 Index		3	2	3	3	3	2.8	31	32.8182	30	36	29	33	31	36	36	31	30	30	31	28	34	29	30	27	33	29	42	41	39	37
NG50 Index		6	5	6	6	6	5.8	106	111.455	109	117	110	106	104	112	112	103	105	103	103	97	110	95	105	96	106	102	146	146	141	124
NG75 Index		9	8	9	9	9	8.8	263	279.727	291	264	288	257	268	279	285	248	254	262	254	247	264	235	260	236	254	254	383	388	375	308
NG90 Index		11	10	12	11	12	11.2	547.5	586.136	621	440	611	545	566	593	584	501	525	560	546	542	544	496	549	497	512	456	875	865	850	617
# Repeats
Number of repeats		17025	17640	16855	16928	16954	17080.4	20459.5	20775.7	20751	21127	20823	20178	20546	20580	21175	20292	19992	19396	20194	20373	19933	20213	19896	20038	23519	20231	22415	22392	22144	20858
Repetitive bases		10251997	11251394	9946393	10232648	10273222	1.03911e+07	10302027	1.02832e+07	10300718	10398135	10336263	9916104	10303336	10234699	10566703	10303791	10055176	9809175	10228843	10307493	10005641	10240402	10033826	10046861	11333626	9924014	10523472	10496294	10495974	10369476
Repetitive content		0.1784	0.1889	0.1751	0.1759	0.179	0.17946	0.1795	0.179118	0.1808	0.1666	0.1819	0.1745	0.1799	0.1795	0.1832	0.1795	0.1771	0.1746	0.1795	0.1804	0.1755	0.1791	0.1775	0.177	0.193	0.1652	0.1852	0.1845	0.1848	0.1813
# Genes
Number of genes		20704	21460	20409	21007	20539	20823.8	20448	20741.3	20501	24967	20471	20413	20451	20431	20780	20703	20288	20165	20482	20440	20546	20445	20221	20287	21200	21815	20384	20404	20393	20522
# BUSCOs (Dataset ODB10 agaricales, 3,870 BUSCOs)
Complete	count	3671	3671	3673	3674	3668	3671.4	3669	3669.05	3667	3666	3669	3663	3668	3669	3666	3671	3669	3669	3672	3669	3674	3674	3674	3677	3671	3671	3669	3657	3668	3666
	percentage	0.948579	0.948579	0.949096	0.949354	0.947804	0.948682	0.948062	0.948074	0.947545	0.947287	0.948062	0.946512	0.947804	0.948062	0.947287	0.948579	0.948062	0.948062	0.948837	0.948062	0.949354	0.949354	0.949354	0.950129	0.948579	0.948579	0.948062	0.944961	0.947804	0.947287
Complete in single copy	count	3629	3611	3629	3630	3607	3621.2	3625.5	3624.05	3618	3621	3621	3615	3626	3626	3617	3629	3625	3625	3628	3626	3627	3632	3632	3635	3629	3626	3620	3608	3620	3623
	percentage	0.937726	0.933075	0.937726	0.937984	0.932041	0.935711	0.936822	0.936446	0.934884	0.935659	0.935659	0.934109	0.936951	0.936951	0.934625	0.937726	0.936693	0.936693	0.937468	0.936951	0.937209	0.938501	0.938501	0.939276	0.937726	0.936951	0.935401	0.9323	0.935401	0.936176
Complete in multiple copies	count	42	60	44	44	61	50.2	44	45	49	45	48	48	42	43	49	42	44	44	44	43	47	42	42	42	42	45	49	49	48	43
	percentage	0.0108527	0.0155039	0.0113695	0.0113695	0.0157623	0.0129716	0.0113695	0.0116279	0.0126615	0.0116279	0.0124031	0.0124031	0.0108527	0.0111111	0.0126615	0.0108527	0.0113695	0.0113695	0.0113695	0.0111111	0.0121447	0.0108527	0.0108527	0.0108527	0.0108527	0.0116279	0.0126615	0.0126615	0.0124031	0.0111111
Fragmented	count	33	33	34	34	36	34	35	35.7727	39	38	37	34	34	34	40	35	34	35	35	34	33	34	33	33	35	36	39	39	38	38
	percentage	0.00852713	0.00852713	0.00878553	0.00878553	0.00930233	0.00878553	0.00904393	0.0092436	0.0100775	0.00981912	0.00956072	0.00878553	0.00878553	0.00878553	0.0103359	0.00904393	0.00878553	0.00904393	0.00904393	0.00878553	0.00852713	0.00878553	0.00852713	0.00852713	0.00904393	0.00930233	0.0100775	0.0100775	0.00981912	0.00981912
Missing	count	166	166	163	162	166	164.6	164	165.182	164	166	164	173	168	167	164	164	167	166	163	167	163	162	163	160	164	163	162	174	164	166
	percentage	0.0428941	0.0428941	0.0421189	0.0418605	0.0428941	0.0425323	0.0423773	0.0426826	0.0423773	0.0428941	0.0423773	0.0447028	0.0434109	0.0431525	0.0423773	0.0423773	0.0431525	0.0428941	0.0421189	0.0431525	0.0421189	0.0418605	0.0421189	0.0413437	0.0423773	0.0421189	0.0418605	0.0449612	0.0423773	0.0428941
		0.948186	0.00103451
