# Supplementary material
Source: publisher figshare collection journal article supplement (https://gsajournals.figshare.com/articles/dataset/_/22713796)
Supplement: Supplementary file 4 [file 1]

Genes affected by SVs

Gene Function

QCR6 subunit 6 of the ubiquinol cytochrome-c reductase complex

P-loop containing nucleoside triphosphate hydrolase protein

S-adenosyl-L-methionine-dependent methyltransferase

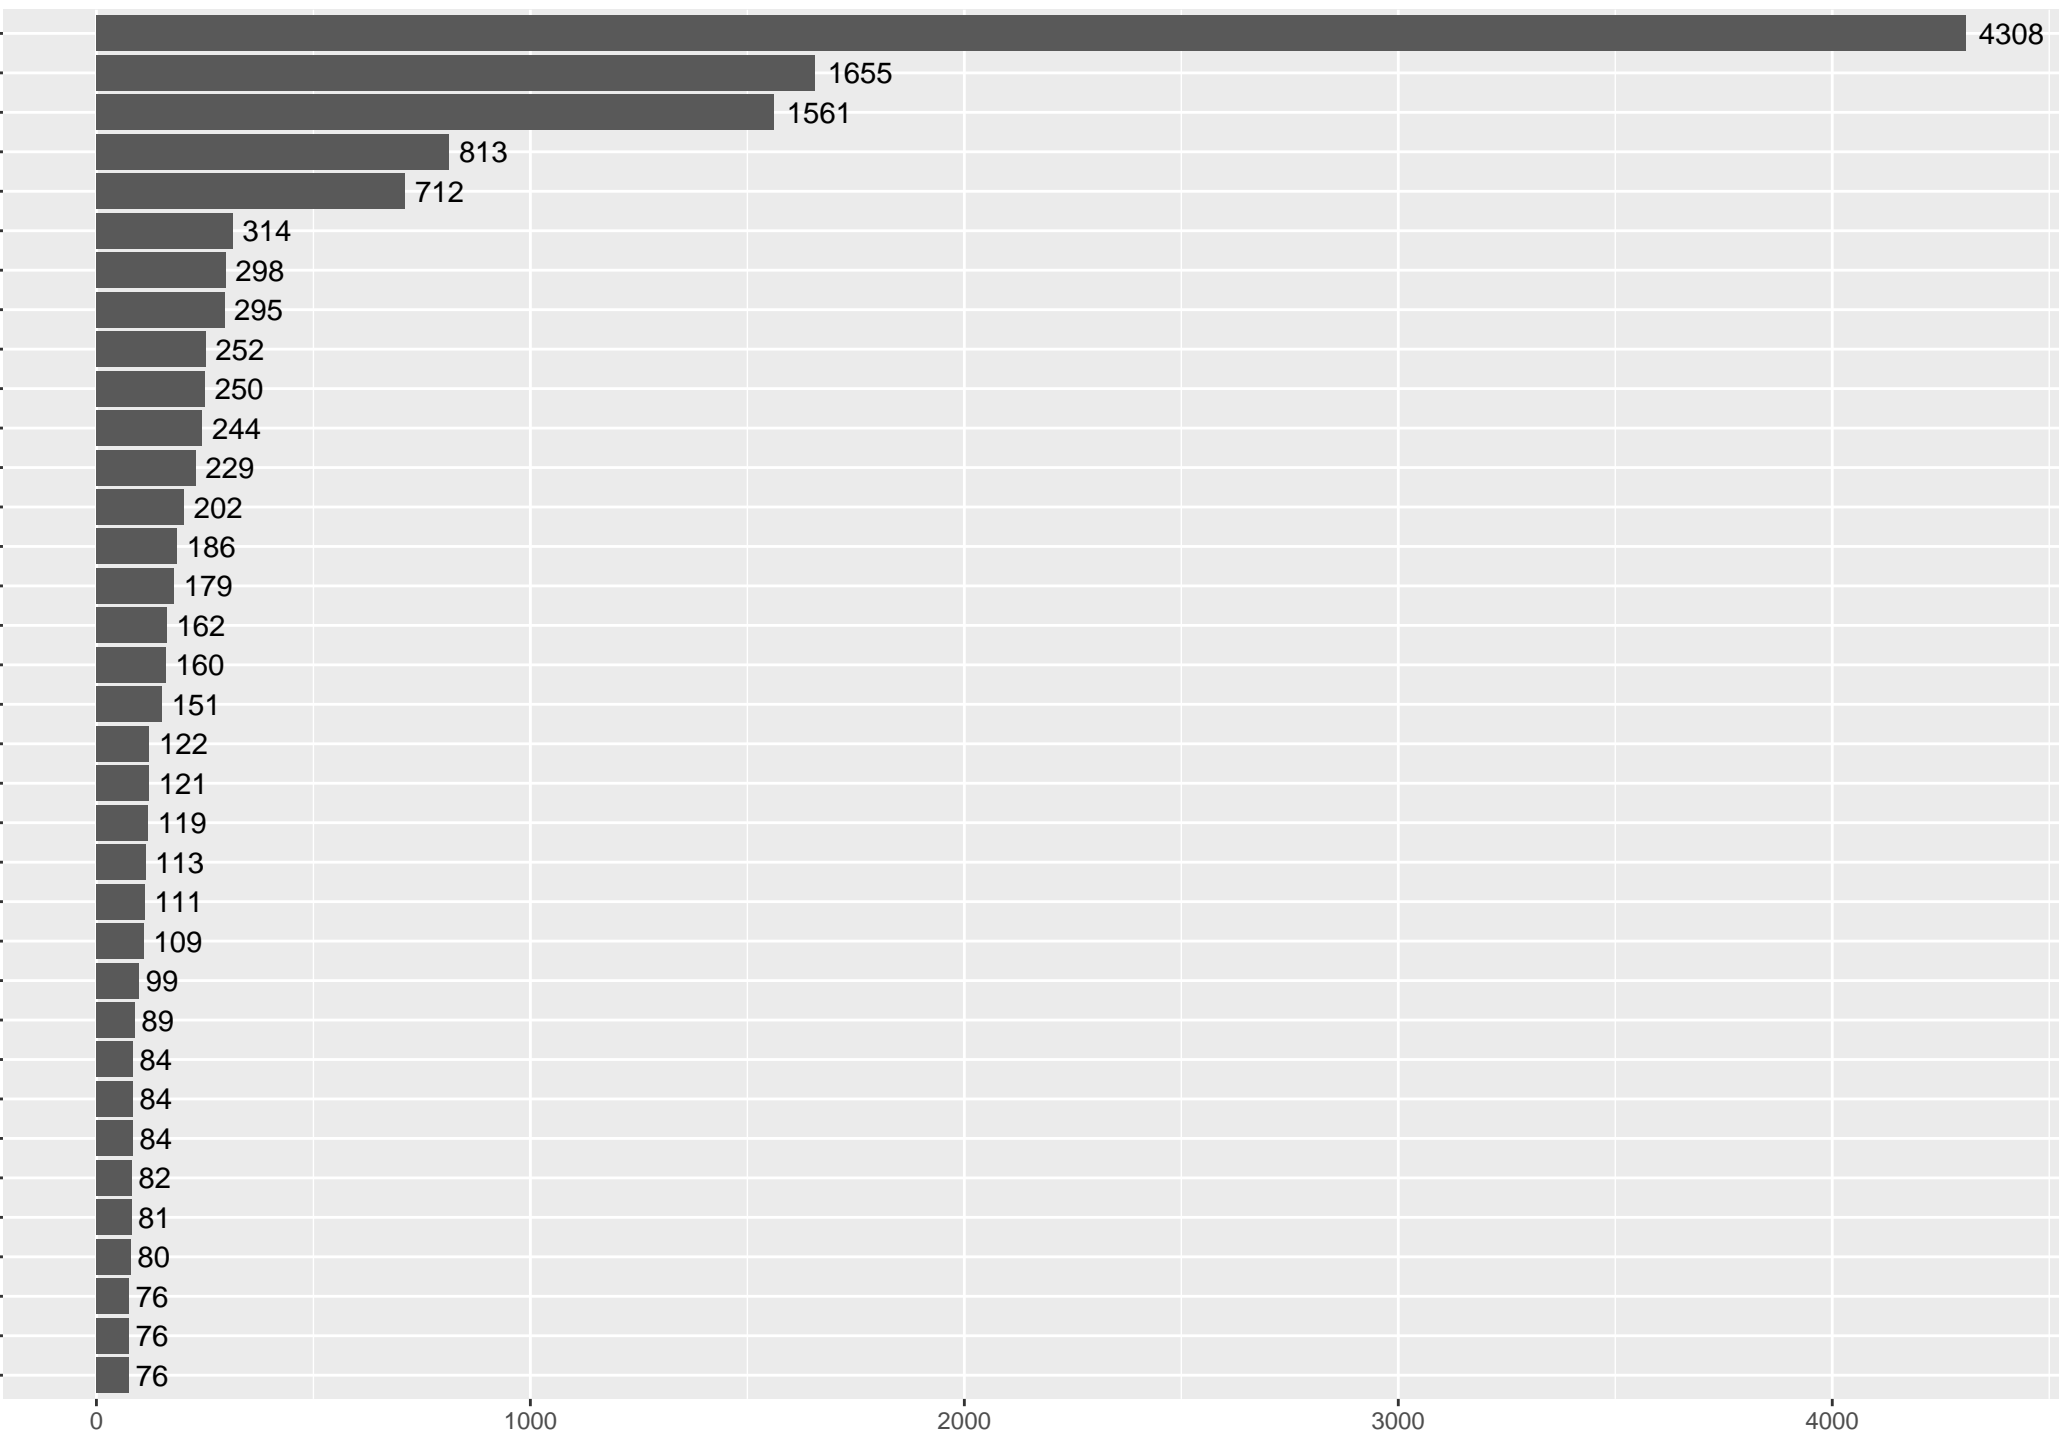

Gene count
