# Supplementary material
Source: publisher figshare collection journal article supplement (https://gsajournals.figshare.com/articles/dataset/_/22713796)
Supplement: Supplementary file 5 [file 1]

| CBM  | CBM8  | 1   | 1  | 1  |    | 1  |    |    |    |    | 1  |    |    | 1  | 1  | 1  | 2  |    |    |    |    |    |    |    |
|------|-------|-----|----|----|----|----|----|----|----|----|----|----|----|----|----|----|----|----|----|----|----|----|----|----|
|      | CBM50 | 11  | 11 | 11 | 11 | 11 | 11 | 11 | 11 | 11 | 11 | 11 | 11 | 11 | 11 | 11 | 11 | 11 | 11 | 11 | 11 |    |    |    |
|      | CBM5  | 7   | 6  | 6  | 6  | 6  | 6  | 6  | 6  | 6  | 6  | 5  | 6  | 6  | 6  | 6  | 6  | 6  | 6  | 6  | 6  |    |    |    |
|      | CBM43 | 1   | 1  | 1  | 1  | 1  | 1  | 1  | 1  | 1  | 1  | 1  | 1  | 1  | 1  | 1  | 1  | 1  | 1  | 1  | 1  |    |    |    |
|      | CBM35 |     | 2  | 2  | 2  | 2  | 2  | 2  | 2  | 2  | 2  | 2  | 2  | 2  | 2  | 2  | 2  | 2  | 2  | 2  | 2  |    |    |    |
|      | CBM32 | 2   | 1  | 1  | 1  | 1  | 1  | 1  | 1  | 1  | 1  | 1  | 1  | 1  | 1  | 1  | 1  | 1  | 1  | 1  | 1  |    |    |    |
|      | CBM22 |     | 1  | 1  | 1  | 1  | 1  | 1  | 1  | 1  | 1  | 1  | 1  | 1  | 1  | 1  | 1  | 1  | 1  | 1  | 1  |    |    |    |
|      | CBM21 | 3   | 3  | 3  | 3  | 3  | 3  | 3  | 3  | 3  | 3  | 3  | 3  | 3  | 3  | 3  | 3  | 3  | 3  | 3  | 3  |    |    |    |
|      | CBM20 | 3   | 3  | 3  | 3  | 3  | 3  | 3  | 3  | 3  | 3  | 3  | 3  | 3  | 3  | 3  | 3  | 3  | 3  | 3  | 3  |    |    |    |
|      | CBM19 | 2   | 1  | 1  | 1  | 1  | 1  | 1  | 1  | 1  | 1  | 1  | 1  | 1  | 1  | 1  | 1  | 1  | 1  | 1  | 1  |    |    |    |
|      | CBM12 | 1   | 2  | 2  | 2  | 2  | 2  | 2  | 2  | 2  | 2  | 2  | 2  | 2  | 2  | 2  | 2  | 2  | 2  | 2  | 2  |    |    |    |
|      | CBM1  | 7   | 13 | 13 | 13 | 14 | 12 | 14 | 14 | 14 | 14 | 14 | 13 | 13 | 13 | 14 | 14 | 14 | 13 | 14 | 13 | 14 |    |    |
|      | CE    | CE9 | 1  | 1  | 1  | 1  | 1  | 1  | 1  | 1  | 1  | 1  | 1  | 1  | 1  | 1  | 1  | 1  | 1  | 1  | 1  | 1  |    |    |
| CE8  |       | 6   | 7  | 7  | 7  | 7  | 7  | 7  | 7  | 7  | 7  | 7  | 7  | 6  | 7  | 7  | 7  | 7  | 7  | 7  | 7  |    |    |    |
| CE5  |       | 3   | 3  | 3  | 3  | 3  | 3  | 3  | 3  | 3  | 3  | 3  | 3  | 3  | 3  | 3  | 3  | 3  | 3  | 3  | 3  |    |    |    |
| CE4  |       | 20  | 16 | 17 | 17 | 17 | 17 | 16 | 17 | 17 | 17 | 17 | 18 | 17 | 17 | 17 | 16 | 17 | 17 | 20 | 16 | 17 |    |    |
| CE3  |       | 1   | 1  | 2  | 1  | 1  | 2  | 1  | 2  | 1  | 2  | 1  | 2  | 1  | 1  | 1  | 1  | 2  | 2  | 2  | 1  | 1  | 1  |    |
| CE2  |       | 1   | 1  | 1  | 1  | 1  | 1  | 1  | 1  | 1  | 1  | 1  | 1  | 1  | 1  | 1  | 1  | 1  | 1  | 1  | 1  | 1  |    |    |
| CE16 |       | 8   | 5  | 7  | 7  | 7  | 6  | 6  | 7  | 7  | 6  | 7  | 7  | 7  | 7  | 5  | 5  | 5  | 7  | 7  | 5  | 6  | 7  | 7  |
| CE15 |       | 2   | 2  | 2  | 2  | 2  | 2  | 2  | 2  | 2  | 2  | 2  | 2  | 2  | 2  | 2  | 2  | 2  | 2  | 2  | 2  | 2  | 2  | 2  |
| CE14 |       | 1   | 1  | 1  | 1  | 1  | 1  | 1  | 1  | 1  | 1  | 1  | 1  | 1  | 1  | 1  | 1  | 1  | 1  | 1  | 1  | 1  | 1  | 1  |
| CE12 |       | 5   | 7  | 7  | 7  | 7  | 7  | 7  | 7  | 7  | 7  | 7  | 7  | 7  | 7  | 7  | 7  | 7  | 7  | 7  | 7  | 7  | 7  | 7  |
| CE10 |       | 9   | 11 | 9  | 9  | 9  | 11 | 10 | 10 | 10 | 10 | 9  | 9  | 9  | 9  | 11 | 11 | 11 | 9  | 9  | 11 | 10 | 9  | 10 |
| CE1  | 10    | 11  | 14 | 14 | 13 | 13 | 13 | 13 | 14 | 13 | 14 | 14 | 14 | 14 | 12 | 12 | 12 | 14 | 14 | 11 | 13 | 13 | 13 |    |
| GH   | GH99  | 3   | 4  | 4  | 4  | 4  | 4  | 4  | 4  | 4  | 4  | 4  | 4  | 4  | 4  | 4  | 4  | 4  | 4  | 4  | 3  | 4  |    |    |
|      | GH95  | 4   | 3  | 3  | 3  | 3  | 3  | 3  | 3  | 3  | 3  | 3  | 3  | 3  | 3  | 3  | 3  | 3  | 3  | 3  | 3  | 3  |    |    |
|      | GH92  | 6   | 4  | 4  | 4  | 4  | 4  | 4  | 4  | 4  | 4  | 4  | 4  | 4  | 4  | 4  | 4  | 4  | 6  | 6  | 6  | 6  | 6  |    |
|      | GH9   | 1   | 1  | 1  | 1  | 1  | 1  | 1  | 1  | 1  | 1  | 1  | 1  | 1  | 1  | 1  | 1  | 1  | 1  | 1  | 1  | 1  | 1  |    |
|      | GH88  | 3   | 2  | 2  | 2  | 2  | 2  | 2  | 2  | 2  | 2  | 2  | 2  | 2  | 2  | 2  | 2  | 2  | 1  | 2  | 2  | 2  | 2  |    |
|      | GH85  | 1   | 1  | 1  | 1  | 1  | 1  | 1  | 1  | 1  | 1  | 1  | 1  | 1  | 1  | 1  | 1  | 1  | 1  | 1  | 1  | 1  | 1  |    |
|      | GH79  | 6   | 4  | 4  | 5  | 4  | 4  | 5  | 4  | 4  | 4  | 4  | 4  | 5  | 5  | 4  | 4  | 4  | 5  | 5  | 4  | 5  | 5  | 4  |
|      | GH78  | 1   | 2  | 2  | 2  | 2  | 2  | 2  | 2  | 2  | 2  | 2  | 2  | 2  | 2  | 2  | 2  | 2  | 2  | 2  | 2  | 2  | 2  | 2  |
|      | GH76  | 10  | 10 | 11 | 10 | 11 | 9  | 13 | 12 | 11 | 10 | 11 | 10 | 10 | 11 | 11 | 11 | 11 | 13 | 13 | 10 | 13 | 10 | 10 |
|      | GH75  |     | 1  | 1  | 1  | 1  | 1  | 1  | 1  | 1  | 1  | 1  | 1  | 1  | 1  | 1  | 1  | 1  | 1  | 1  | 1  | 1  | 1  | 1  |
|      | GH72  | 1   | 1  | 1  | 1  | 1  | 1  | 1  | 1  | 1  | 1  | 1  | 1  | 1  | 1  | 1  | 1  | 1  | 1  | 1  | 1  | 1  | 1  | 1  |
|      | GH71  | 5   | 4  | 4  | 4  | 4  | 4  | 6  | 4  | 4  | 4  | 4  | 4  | 4  | 4  | 4  | 4  | 4  | 6  | 6  | 6  | 4  | 5  |    |
|      | GH7   | 4   | 3  | 3  | 3  | 3  | 3  | 3  | 3  | 3  | 3  | 3  | 3  | 3  | 3  | 3  | 3  | 3  | 3  | 3  | 3  | 3  | 3  | 3  |
|      | GH61  | 24  | 21 | 22 | 23 | 22 | 22 | 22 | 22 | 22 | 22 | 23 | 22 | 23 | 23 | 23 | 23 | 23 | 22 | 20 | 21 | 22 | 24 | 22 |
|      | GH6   | 4   | 5  | 4  | 4  | 5  | 5  | 5  | 5  | 5  | 5  | 4  | 4  | 4  | 4  | 5  | 5  | 5  | 4  | 4  | 5  | 5  | 4  | 5  |
|      | GH55  | 4   | 3  | 3  | 3  | 3  | 3  | 3  | 3  | 3  | 3  | 3  | 3  | 3  | 3  | 3  | 3  | 3  | 3  | 3  | 3  | 3  | 3  | 3  |
|      | GH53  | 1   | 1  | 1  | 1  | 1  | 1  | 1  | 1  | 1  | 1  | 1  | 1  | 1  | 1  | 1  | 1  | 1  | 1  | 1  | 1  | 1  | 1  | 1  |
|      | GH5   | 27  | 29 | 28 | 29 | 29 | 29 | 28 | 29 | 29 | 29 | 29 | 28 | 29 | 29 | 28 | 28 | 28 | 29 | 28 | 29 | 28 | 29 | 29 |
|      | GH47  | 11  | 8  | 8  | 8  | 8  | 8  | 8  | 8  | 8  | 8  | 8  | 8  | 8  | 8  | 8  | 8  | 8  | 8  | 8  | 8  | 8  | 8  | 8  |
|      | GH45  | 1   | 2  | 2  | 2  | 2  | 2  | 2  | 2  | 2  | 2  | 2  | 2  | 2  | 2  | 2  | 2  | 2  | 2  | 2  | 2  | 2  | 2  | 2  |
|      | GH44  | 1   | 2  | 2  | 2  | 2  | 2  | 2  | 2  | 2  | 2  | 2  | 2  | 2  | 2  | 2  | 2  | 2  | 1  | 1  |    | 2  | 2  | 2  |
|      | GH43  | 10  | 7  | 7  | 7  | 7  | 7  | 8  | 7  | 7  | 7  | 7  | 7  | 7  | 7  | 8  | 8  | 8  | 7  | 9  | 8  | 8  | 9  | 9  |
|      | GH38  | 1   | 1  | 1  | 1  | 1  | 1  | 1  | 1  | 1  | 1  | 1  | 1  | 1  | 1  | 1  | 1  | 1  | 1  | 1  | 1  | 1  | 1  | 1  |
|      | GH37  | 2   | 3  | 3  | 3  | 3  | 3  | 3  | 3  | 3  | 3  | 3  | 3  | 3  | 3  | 3  | 3  | 3  | 2  | 3  | 3  | 3  | 3  | 3  |
|      | GH35  | 8   | 5  | 5  | 6  | 6  | 7  | 7  | 6  | 6  | 6  | 7  | 6  | 6  | 7  | 5  | 5  | 5  | 6  | 6  | 5  | 7  | 7  | 6  |
|      | GH32  | 1   | 1  | 1  | 1  | 1  | 1  | 1  | 1  | 1  | 1  | 1  | 1  | 1  | 1  | 1  | 1  | 1  | 1  | 1  | 1  | 1  | 1  | 1  |
|      | GH31  | 7   | 7  | 7  | 7  | 7  | 7  | 7  | 7  | 7  | 7  | 7  | 7  | 7  | 7  | 7  | 7  | 7  | 7  | 7  | 7  | 7  | 7  | 7  |
|      | GH30  | 4   | 5  | 4  | 4  | 5  | 5  | 5  | 5  | 5  | 4  | 4  | 4  | 4  | 4  | 5  | 5  | 5  | 5  | 5  | 5  | 5  | 4  | 5  |
|      | GH3   | 19  | 15 | 15 | 15 | 16 | 16 | 16 | 16 | 16 | 16 | 15 | 15 | 15 | 15 | 15 | 15 | 15 | 16 | 16 | 15 | 16 | 15 | 16 |
|      | GH29  | 2   | 3  | 3  | 3  | 3  | 3  | 3  | 3  | 3  | 3  | 3  | 3  | 3  | 3  | 3  | 3  | 3  | 3  | 3  | 3  | 3  | 3  | 3  |
|      | GH28  | 14  | 11 | 10 | 10 | 10 | 11 | 10 | 11 | 11 | 11 | 10 | 10 | 10 | 10 | 11 | 11 | 11 | 10 | 10 | 11 | 10 | 10 | 11 |
|      | GH25  | 1   | 1  | 1  | 1  | 1  | 1  | 1  | 1  | 1  | 1  | 1  | 1  | 1  | 1  | 1  | 1  | 1  | 1  | 1  | 1  | 1  | 1  | 1  |
|      | GH20  | 2   | 2  | 2  | 2  | 2  | 2  | 2  | 2  | 2  | 2  | 2  |    |    |    |    |    |    |    |    |    |    |    |    |
