# Supplementary material
Source: publisher figshare collection journal article supplement (https://gsajournals.figshare.com/articles/dataset/_/22713796)

Shared breaking points of structural variants with respect to M. roreri B3

Presence/absence binary distance

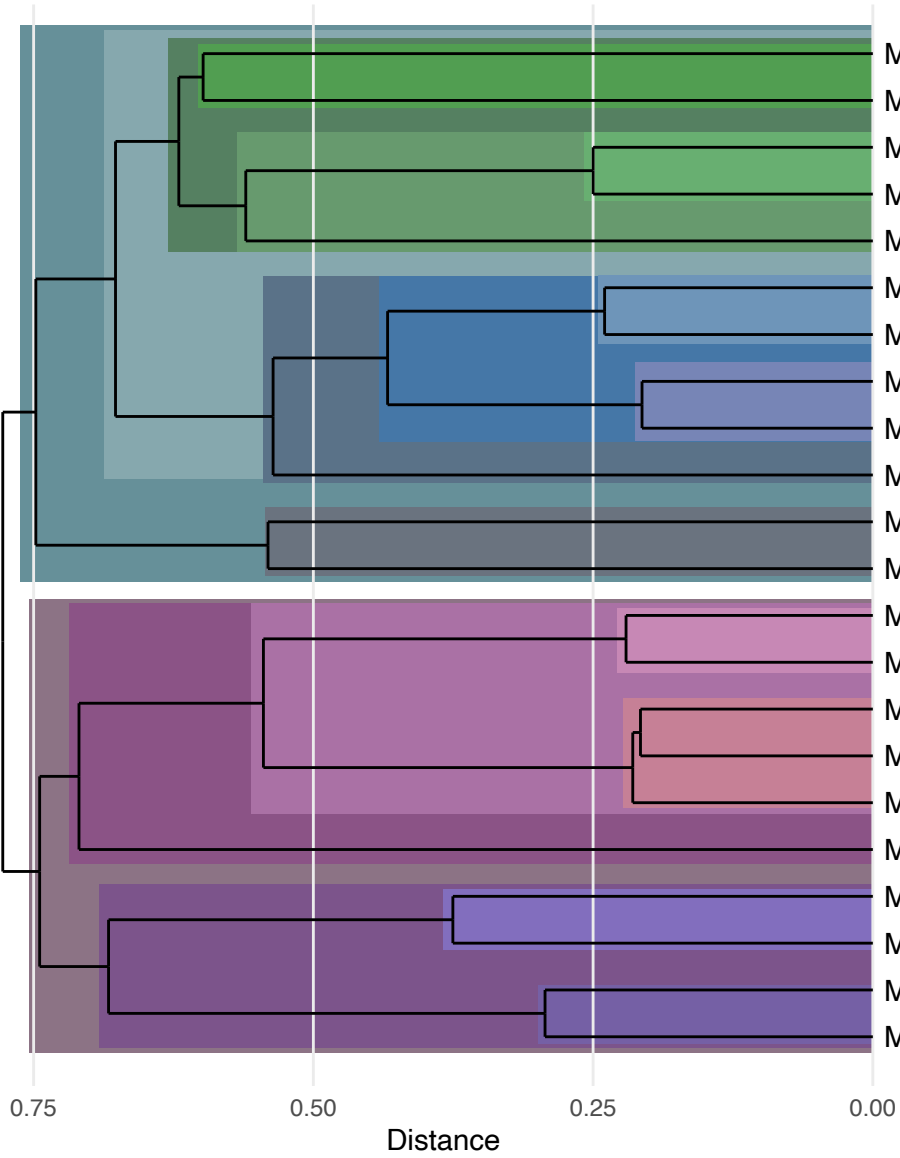

Shared breaking points of structural variants with respect to M. roreri C26

Presence/absence binary distance

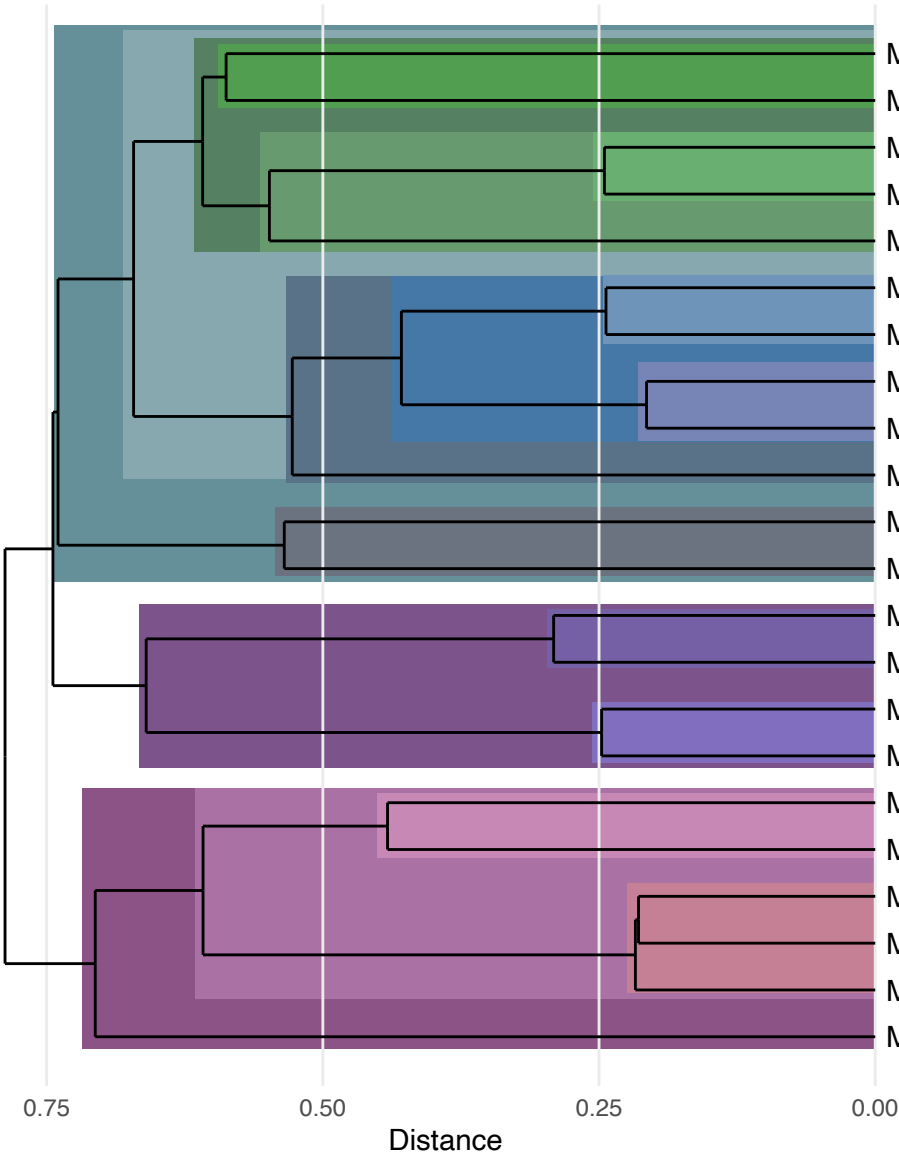

Shared breaking points of structural variants with respect to M. roreri Co8

Presence/absence binary distance

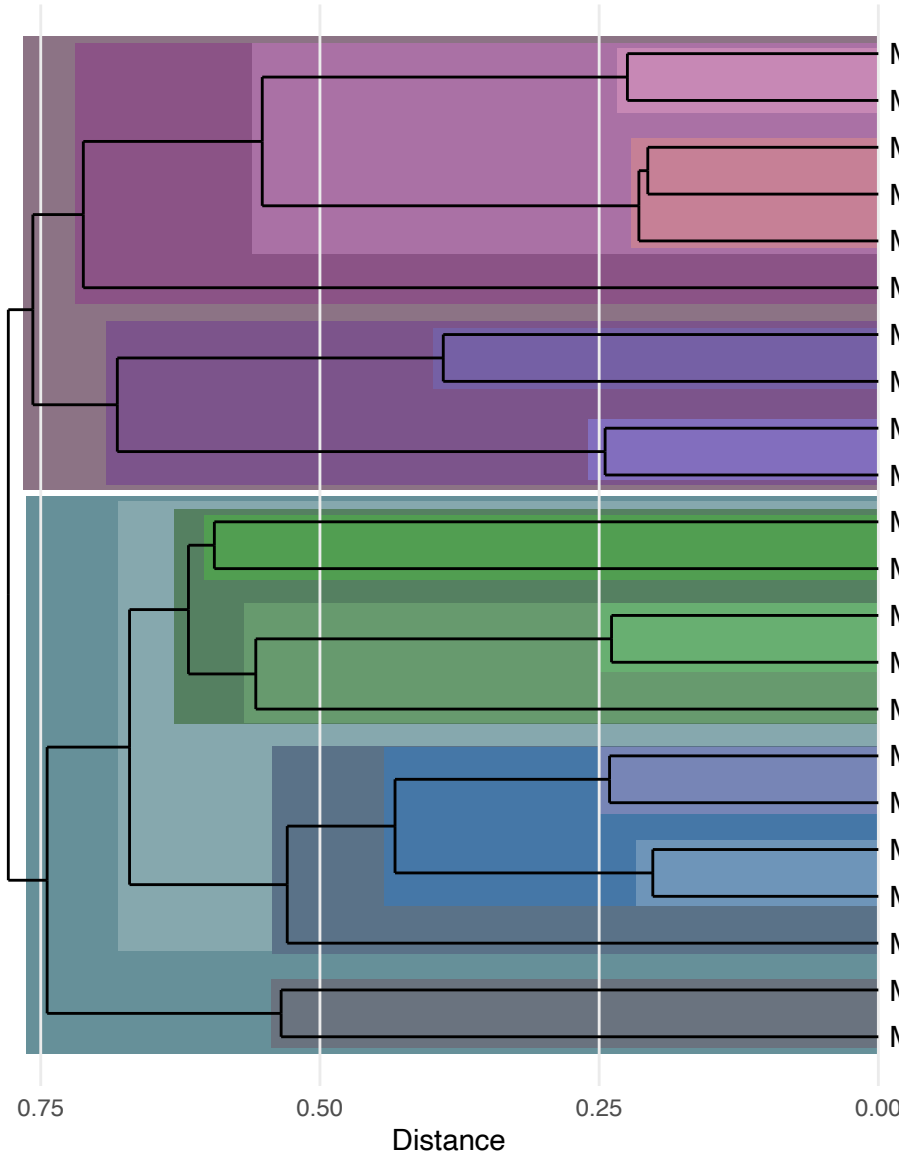

Shared breaking points of structural variants with respect to M. roreri Co84

Presence/absence binary distance

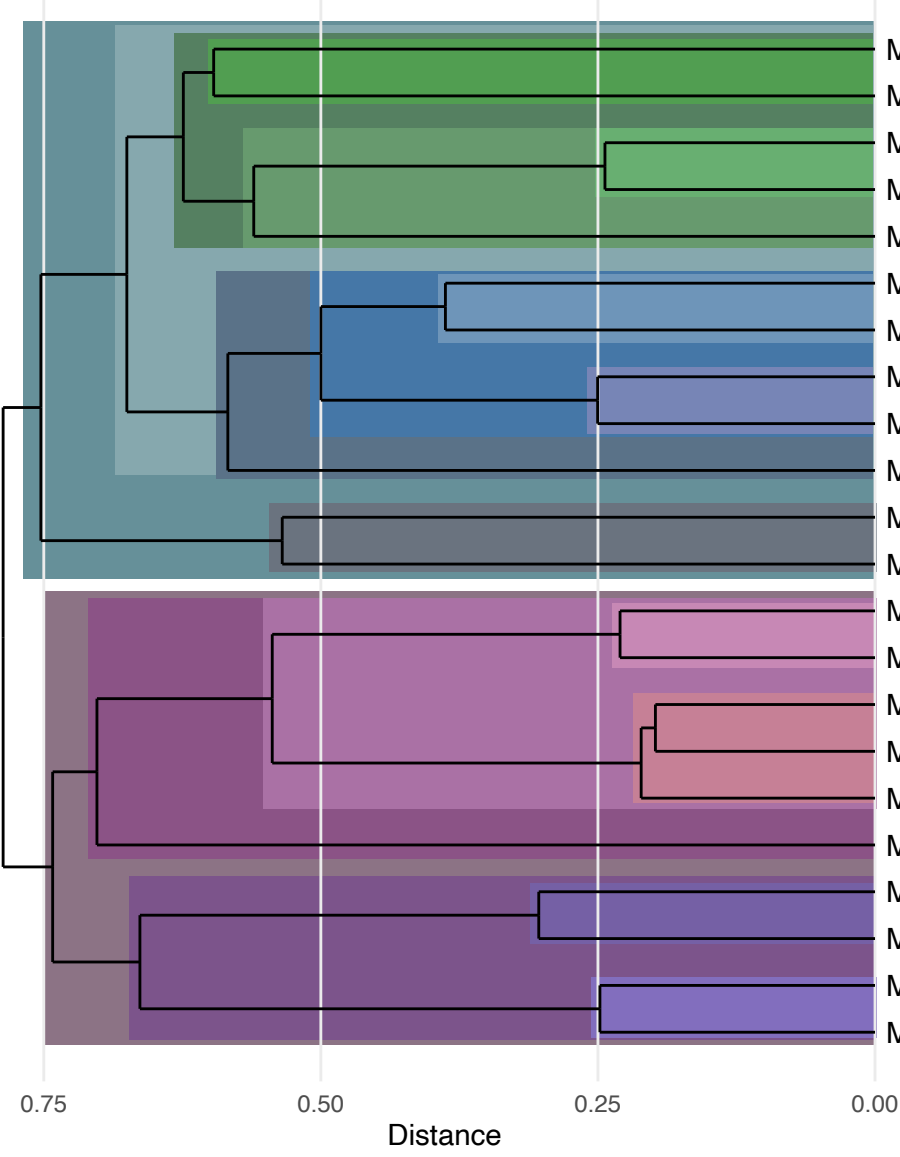

Shared breaking points of structural variants with respect to M. roreri E7

Presence/absence binary distance

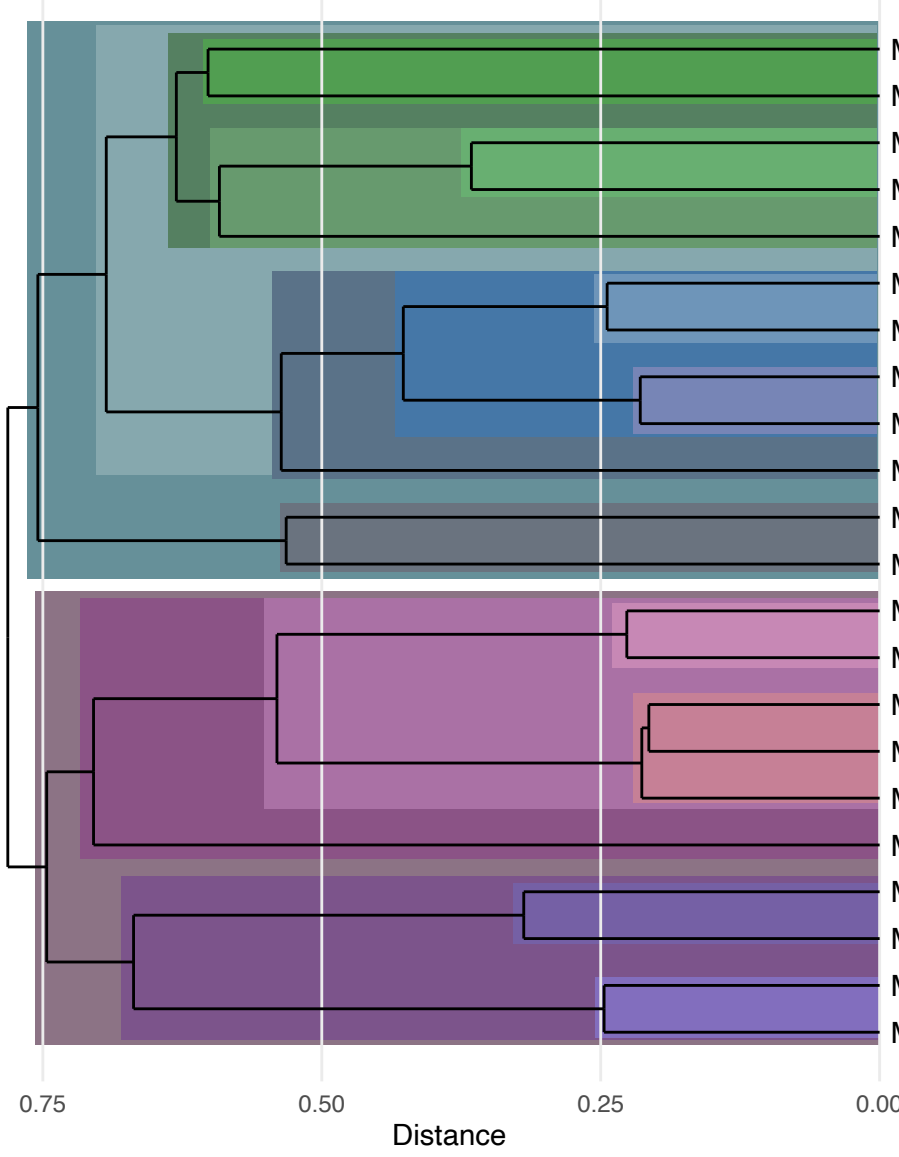

Supplement: Supplementary file 6 [file 1]
