# Supplementary material
Source: publisher figshare collection journal article supplement (https://gsajournals.figshare.com/articles/dataset/_/22713796)
Supplement: Supplementary file 8 [file 1]

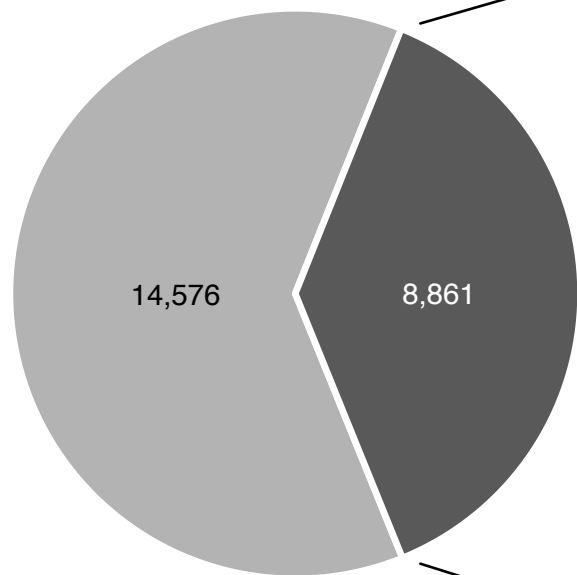

Non-single copy genes orthogroups

Number of non-single copy orthogroups

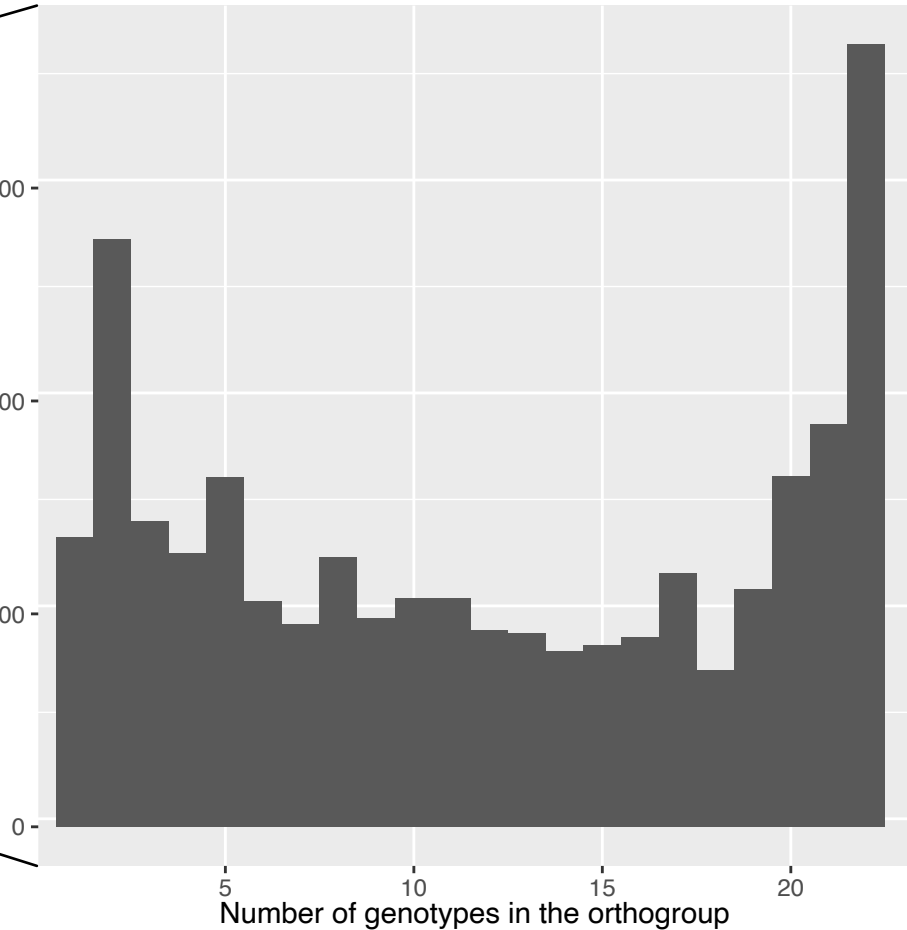

Number of genotypes in the orthogroup
