# Supplementary material
Source: publisher figshare collection journal article supplement (https://gsajournals.figshare.com/articles/dataset/_/22713796)

A

Query

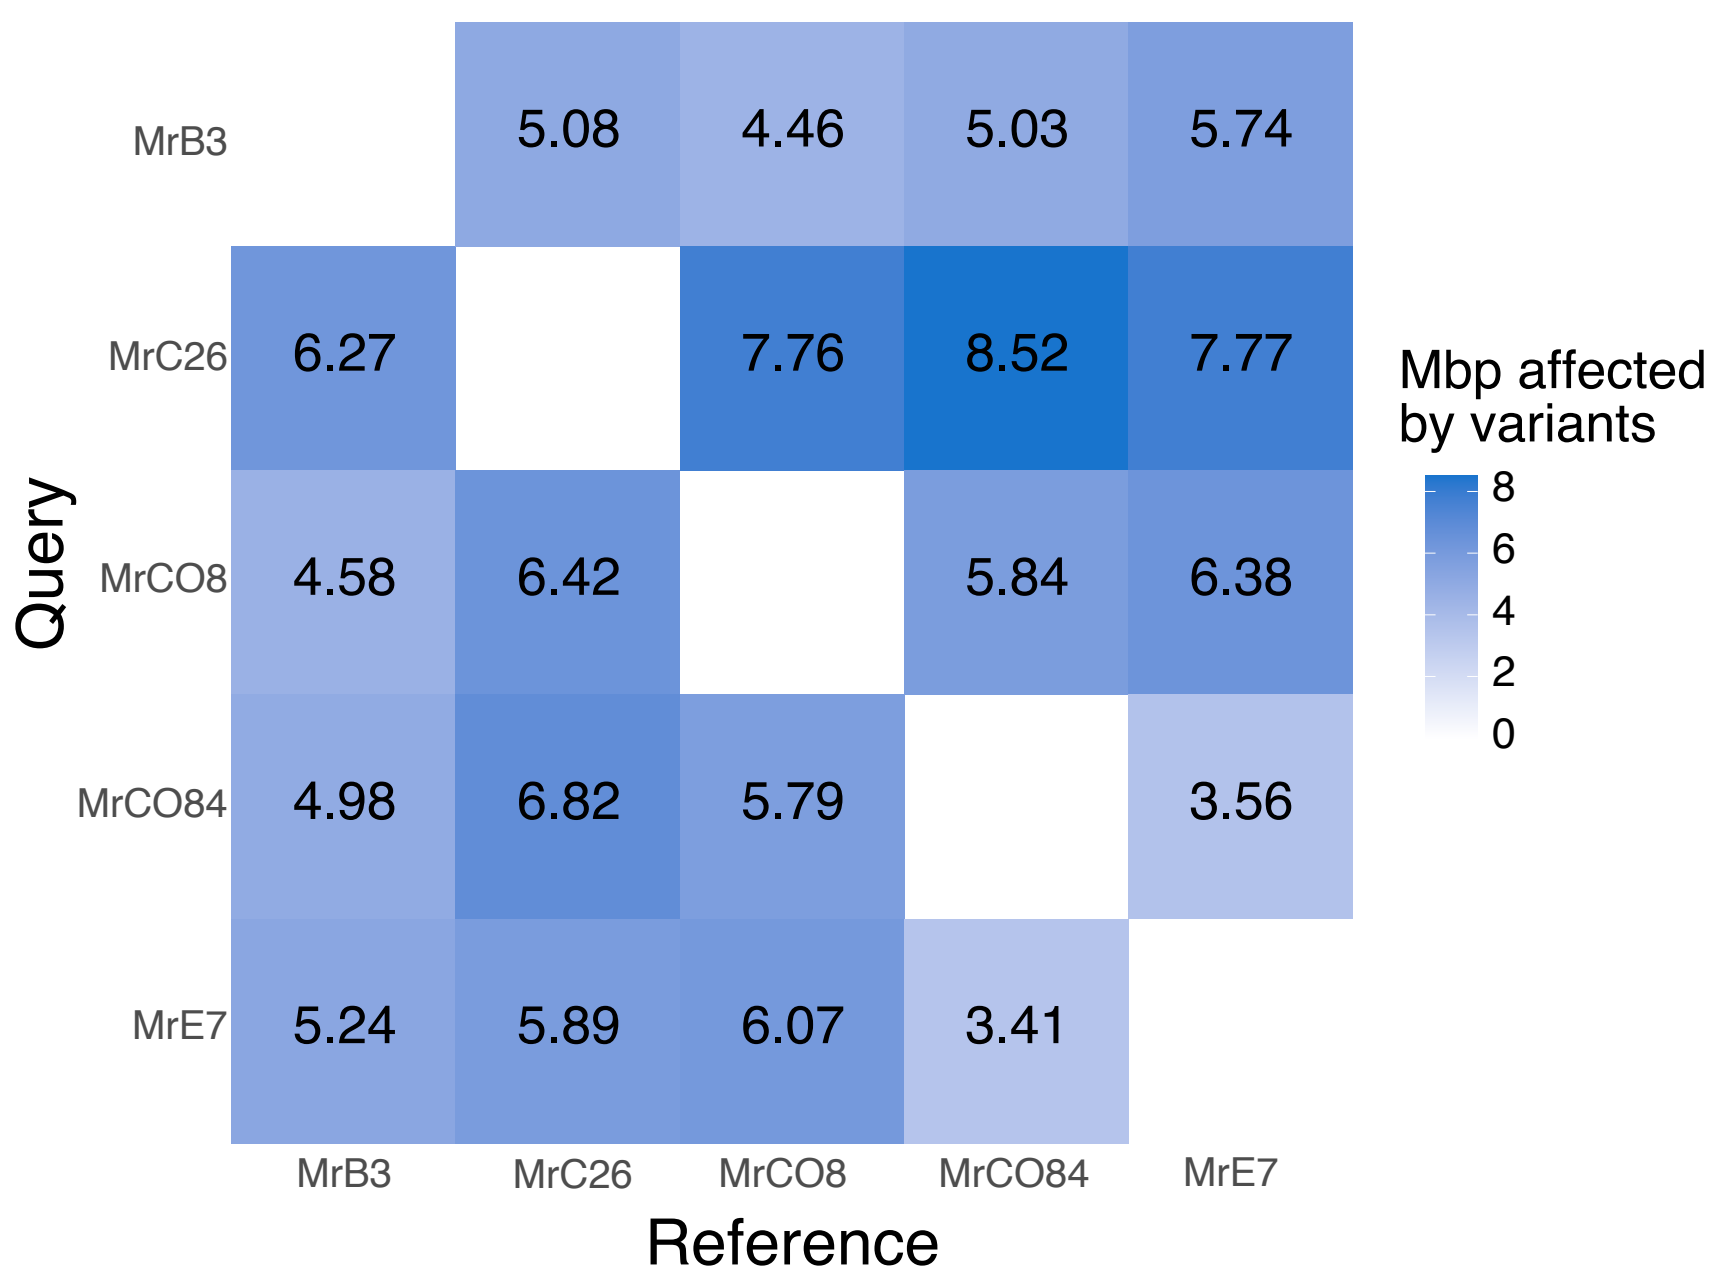

B

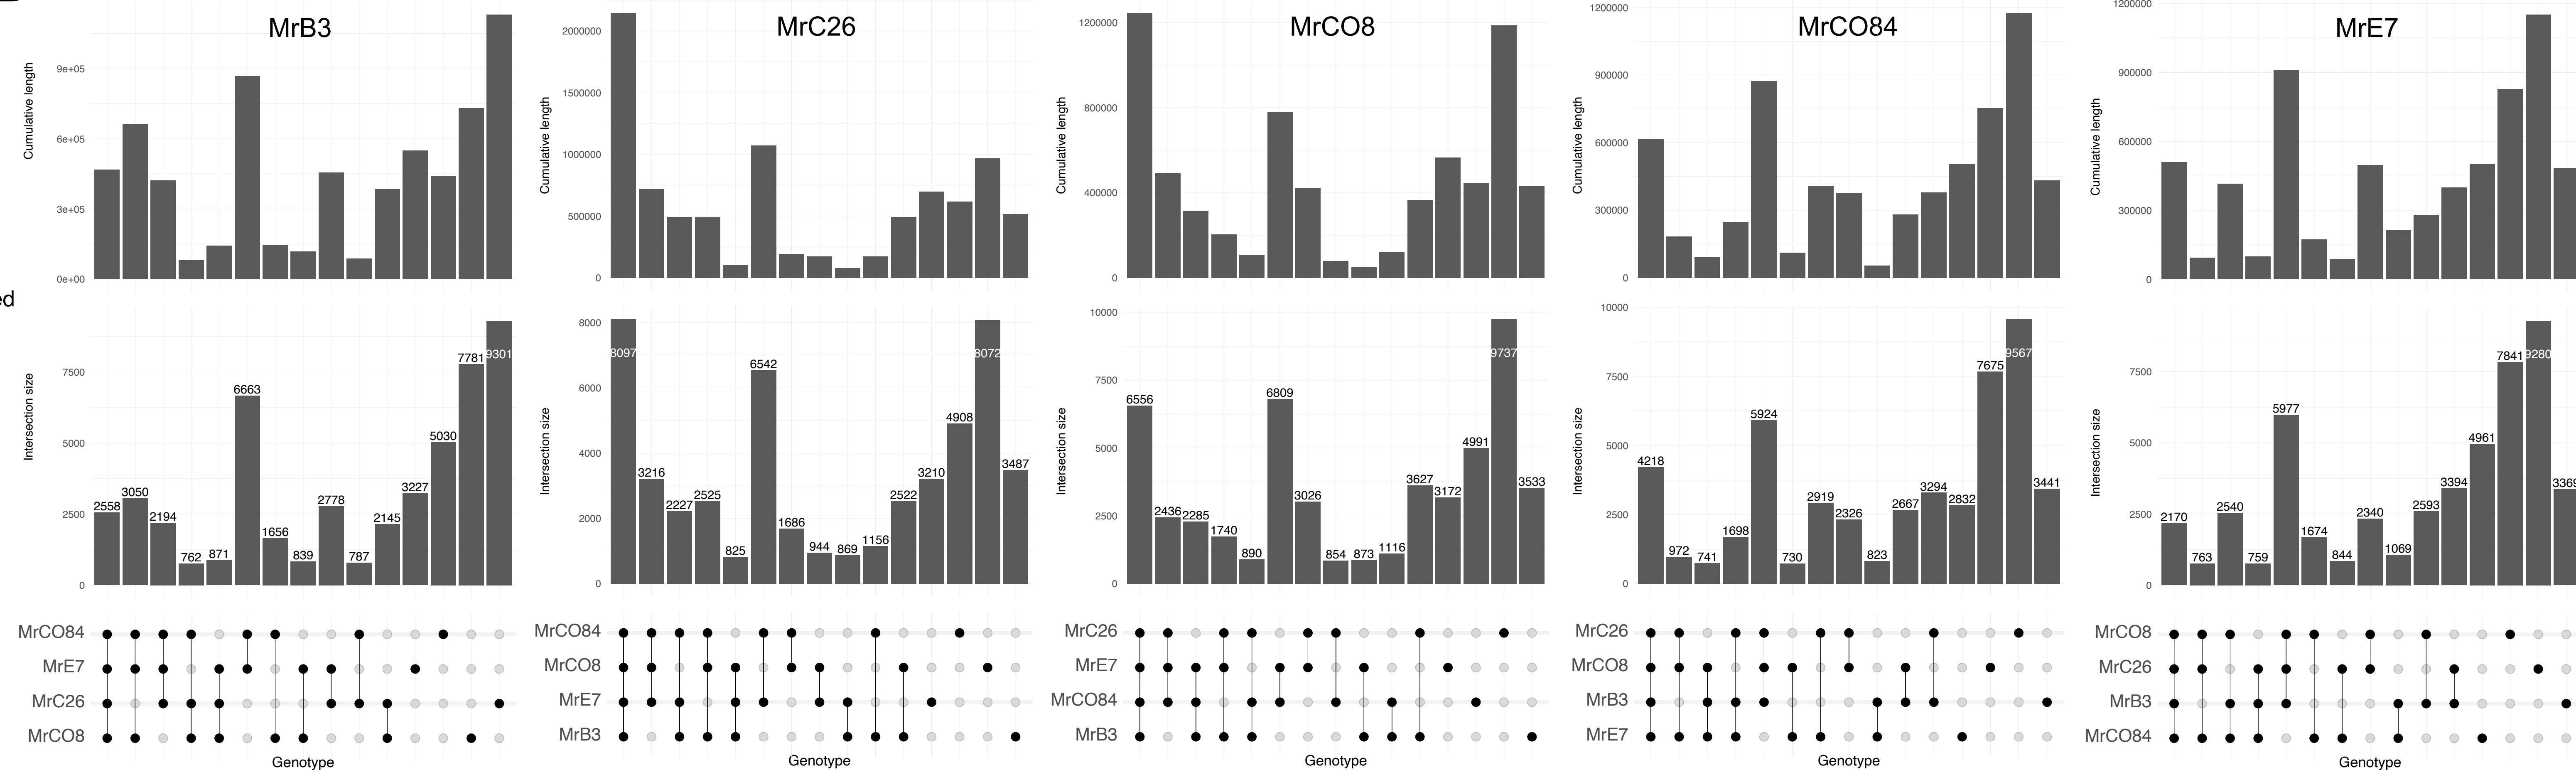

C

Query

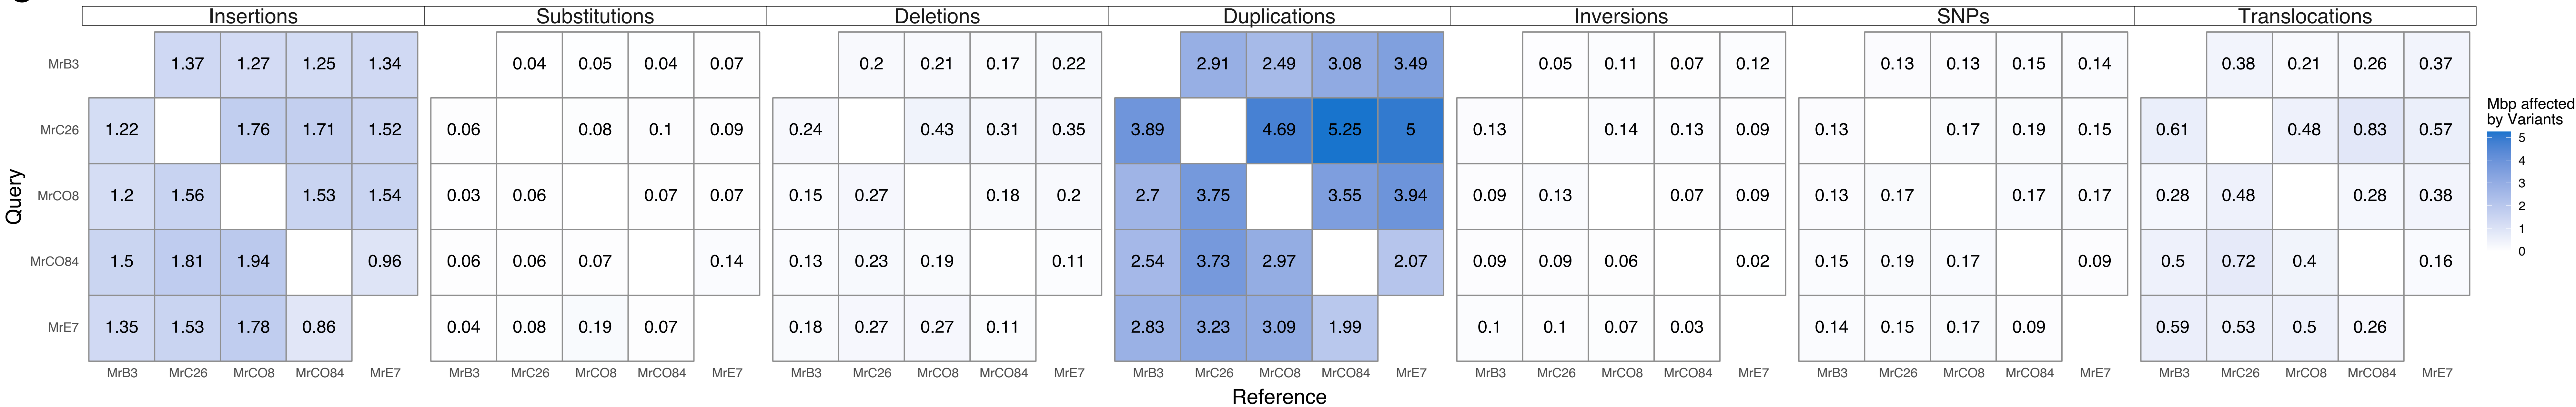

Supplement: Supplementary file 1 [file 1]

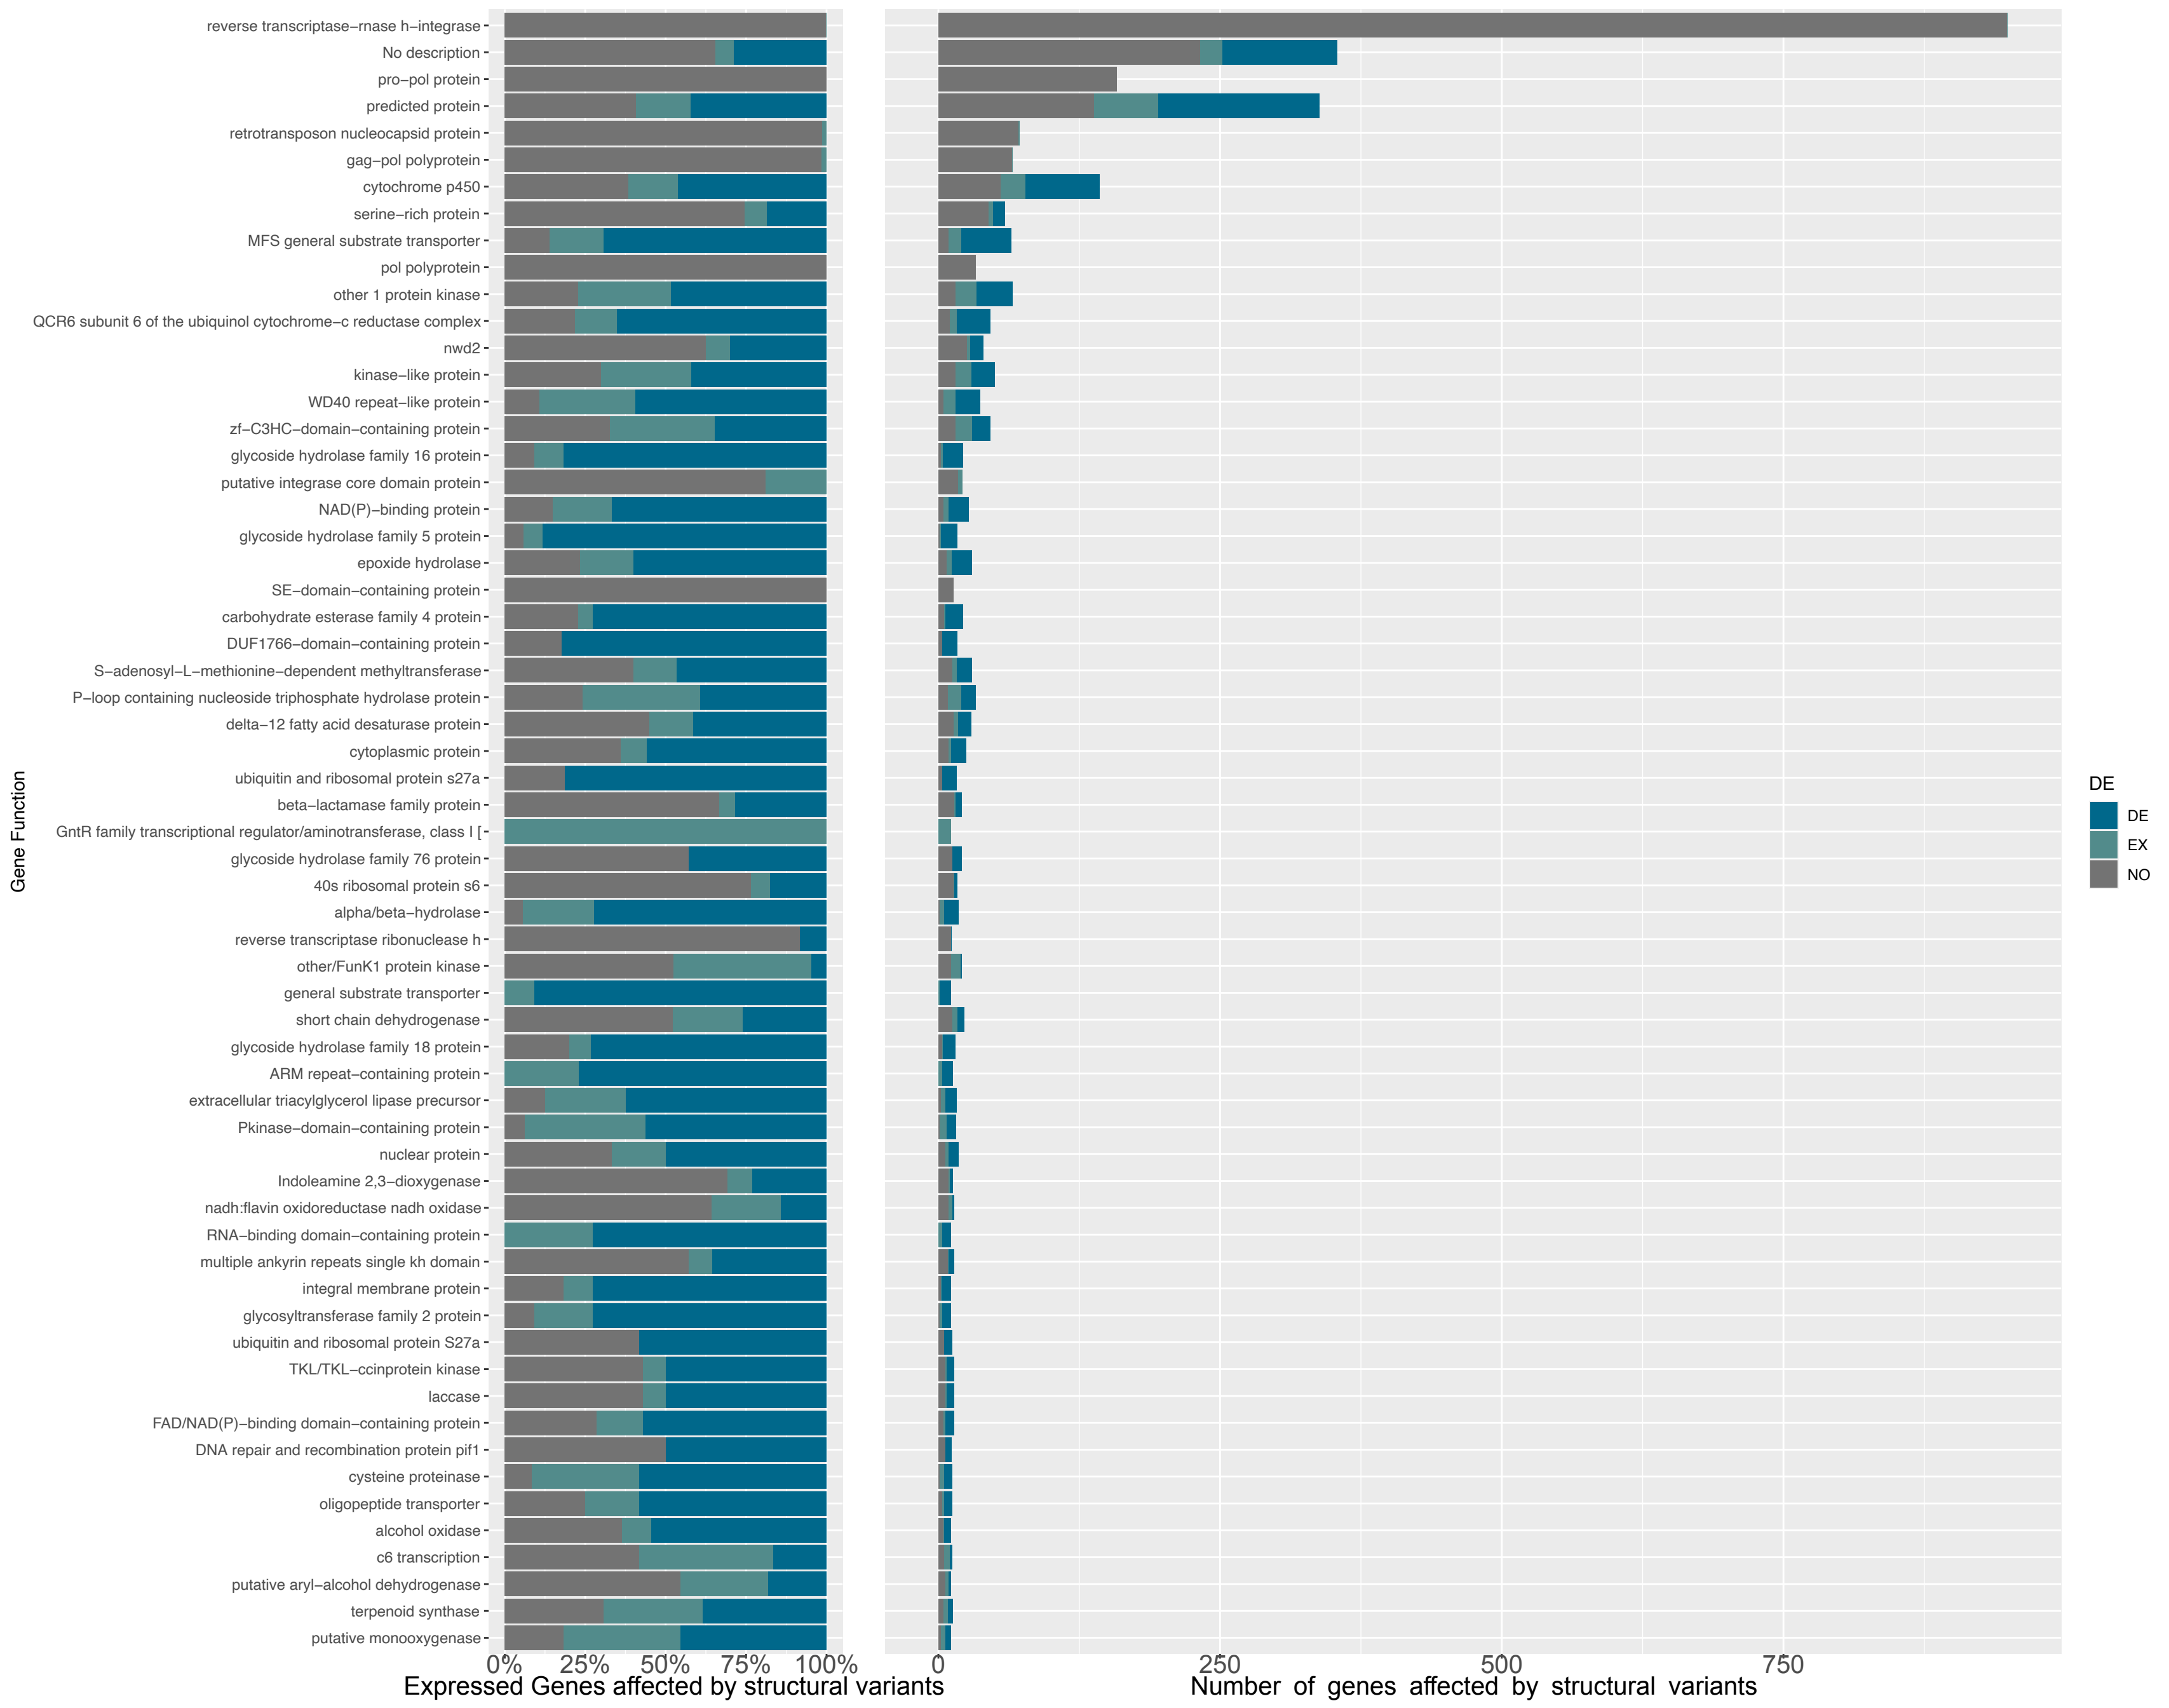

Supplement: Supplementary file 3 [file 1]

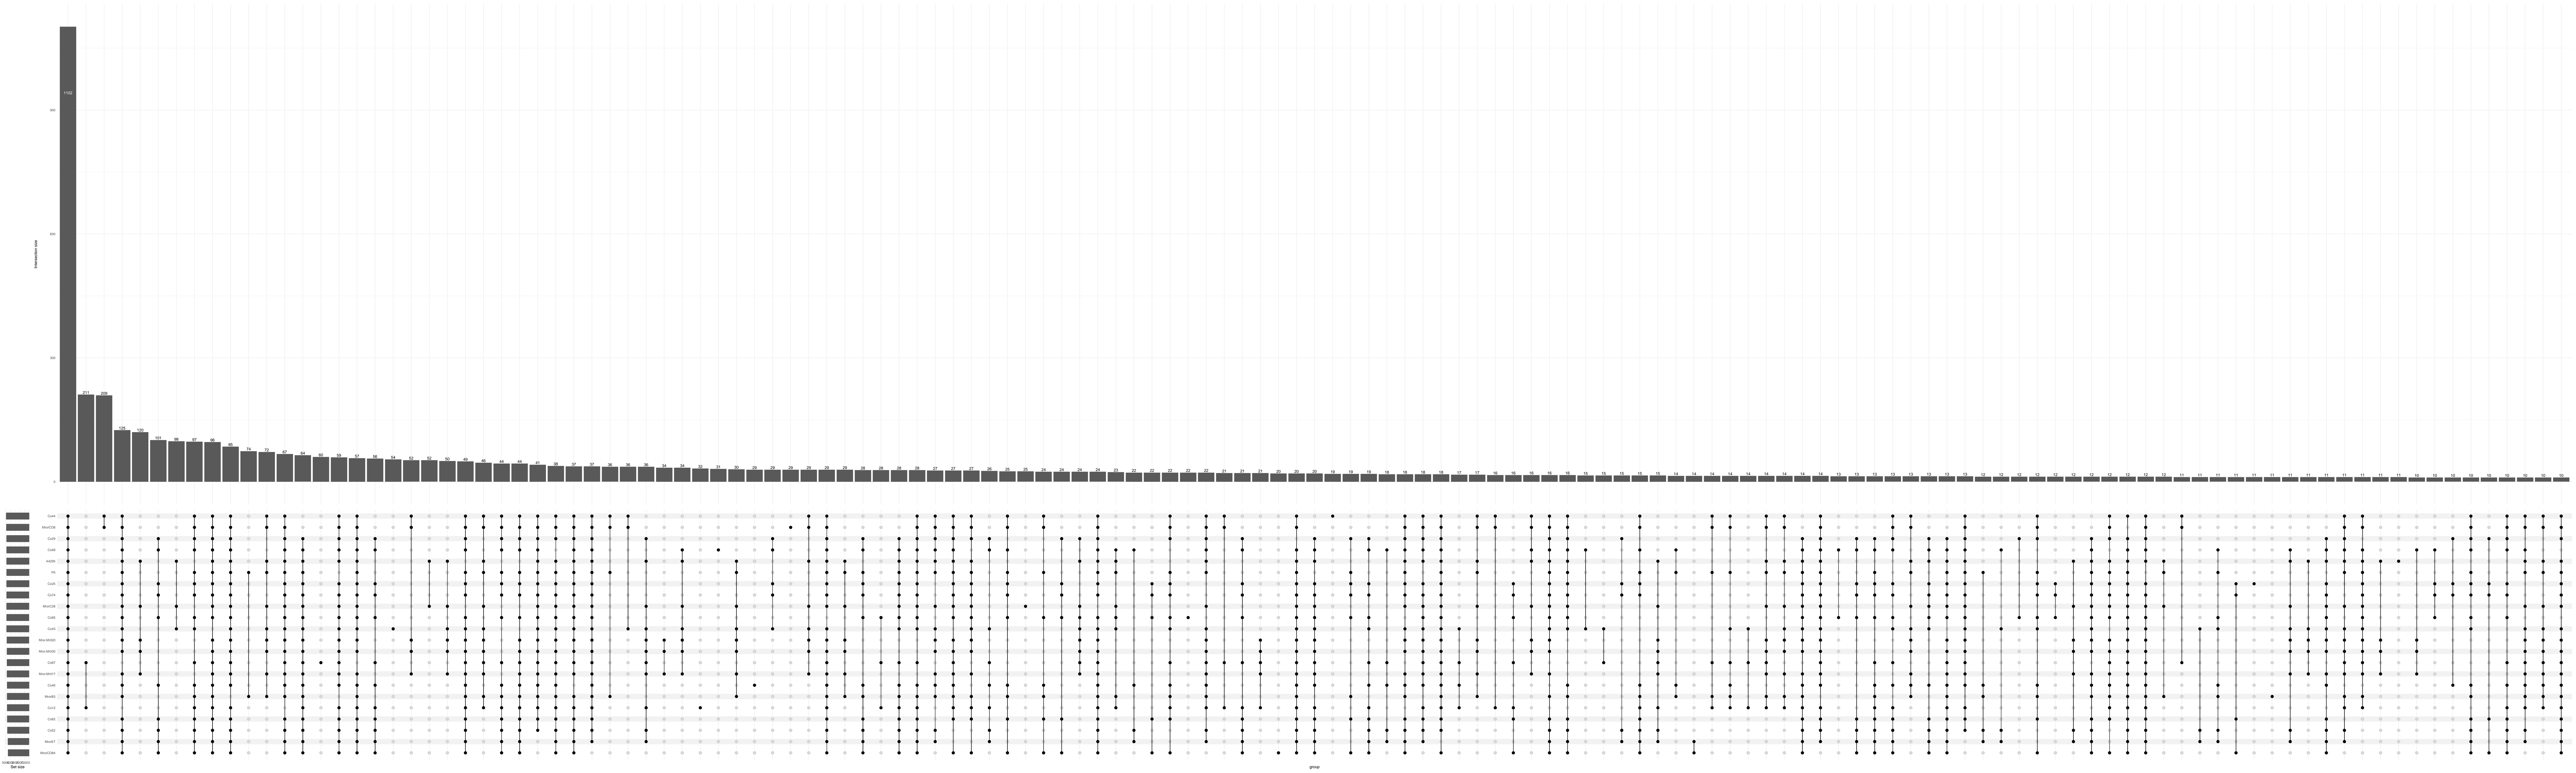

Supplement: Supplementary file 7 [file 1]
